# Supplementary material for: Low Blood Levels of Selenium, Selenoprotein P and GPx3 are Associated with Accelerated Biological Aging: Results from the Berlin Aging Study II (BASE-II)
Source: bioRxiv or medRxiv preprint supplement (doi:10.1101/2024.04.04.24305314), 2024-04-05
Supplement: Supplementary file [file media-1.pdf]

## **Low Blood Levels of Selenium, Selenoprotein P and GPx3 are Associated with Accelerated Biological Aging: Results from the Berlin Aging Study II (BASE-II)**

Valentin Max Vetter <sup>1,a</sup>, Kamil Demircan <sup>2,a</sup>, Jan Homann <sup>3</sup>, Thilo Samson Chillon <sup>2</sup>, Michael Mülleder <sup>4</sup>, Orr Shomroni <sup>4</sup>, Elisabeth Steinhagen-Thiessen <sup>1</sup>, Markus Ralser <sup>4,5</sup>, Christina M. Lill <sup>3,6</sup>, Lars Bertram <sup>7</sup>, Lutz Schomburg <sup>2,b</sup>, Ilja Demuth <sup>1,8,b</sup>

<sup>a</sup> Valentin Max Vetter and Kamil Demircan are joint first authors.

<sup>b</sup> Lutz Schomburg and Ilja Demuth are joint last authors.

<sup>1</sup> Charité – Universitätsmedizin Berlin, corporate member of Freie Universität Berlin and Humboldt-Universität zu Berlin, Department of Endocrinology and Metabolic Diseases (including Division of Lipid Metabolism), Biology of Aging working group, Augustenburger Platz 1, 13353 Berlin, Germany

<sup>2</sup> Institute for Experimental Endocrinology, Charité - Universitätsmedizin Berlin, Corporate Member of Freie Universität Berlin and Humboldt-Universität zu Berlin, Max Rubner Center (MRC) for Cardiovascular Metabolic Renal Research, D-10115, Berlin, Germany

<sup>3</sup> Institute of Epidemiology and Social Medicine, University of Münster, Münster, Germany

<sup>4</sup> Core Facility High Throughput Mass Spectrometry, Charité - Universitätsmedizin Berlin, corporate member of Freie Universität Berlin and Humboldt-Universität zu Berlin, Berlin, Germany

<sup>5</sup> The Centre for Human Genetics, Nuffield Department of Medicine, University of Oxford, UK

<sup>6</sup> Aging Epidemiology Research Unit (AGE), School of Public Health, Imperial College London, London, UK

<sup>7</sup> Lübeck Interdisciplinary Platform for Genome Analytics (LIGA), University of Lübeck, Lübeck, Germany

<sup>8</sup> Charité - Universitätsmedizin Berlin, corporate member of Freie Universität Berlin, Humboldt-Universität zu Berlin, and Berlin Institute of Health, Regenerative Immunology and Aging, BIH Center for Regenerative Therapies, 13353 Berlin, Germany

Corresponding Author:

Ilja Demuth (Ph.D.)

Charité - Universitätsmedizin Berlin

Lipid Clinic at the Interdisciplinary Metabolism Center,

Biology of Aging Group

Augustenburger Platz 1

13353 Berlin

Email: [ilja.demuth@charite.de](mailto:ilja.demuth@charite.de)

Phone: ++49 30 450 569 143

FAX: ++49 30 450 566 904

## Supplementary Material

### Methods:

#### *Measurement of GPx3*

The sample preparation involved semi-automated processing of serum samples in 96-well plates, including denaturation, reduction, alkylation, trypsin digestion, and cleanup steps (34). Liquid chromatography-mass spectrometry (LC-MS) analysis was conducted using a Bruker timsTOF Pro system coupled with an Agilent 1290 Infinity II LC system (35). Computational proteomics involved generating a spectral library based on Human Plasma PeptideAtlas and annotating peptide sequences to the Uniprot human reference proteome (36, 37). The software DIA-NN was used for data annotation and quantification (38). Pre-processing was performed using MS-DAP (39) as framework and included data normalization, outlier sample filtering, low-presence peptide filtering, data imputation, and batch correction to ensure high data quality.

Tables:

Supplementary Table 1: Standardized mean difference of epigenetic age estimators between selenium deficient participants and selenium sufficient participants. Statistical significance of difference was assessed by t-test.

| Variable       | Deficient    |     | Sufficient   |     | p     | SMD  |
|----------------|--------------|-----|--------------|-----|-------|------|
|                | Mean(SD)     | n   | Mean (SD)    | n   |       |      |
| Horvath DNAmAA | -0.03 (4.20) | 391 | 0.15 (4.34)  | 391 | 0.566 | 0.04 |
| GrimAge DNAmAA | -0.11 (3.08) | 391 | -0.04 (3.13) | 391 | 0.771 | 0.02 |
| DunedinPACE    | 1.02 (0.11)  | 440 | 1.00 (0.10)  | 425 | 0.010 | 0.18 |

Note: SD = Standard Deviation, n = number of observations, SMD = Standardized Mean Difference.

Supplementary Table 2: Linear regression analysis of epigenetic age estimators calculated from all six epigenetic clocks available on selenium status (deficient vs. sufficient) in the complete dataset as well as sex-stratified subgroups. Model 1 is unadjusted. Model 2 is adjusted for chronological age, sex, BMI, smoking (packyears), and the first four genetic principal components (PC1 to PC4).

| Clock                | Model | St. $\beta$ | $\beta$ | SE    | p     | lowCI  | upCI   | n    |
|----------------------|-------|-------------|---------|-------|-------|--------|--------|------|
| <b>Women and Men</b> |       |             |         |       |       |        |        |      |
| 7-CpG DNAmAA         | 1     | 0.022       | 0.298   | 0.396 | 0.452 | -0.480 | 1.075  | 1198 |
|                      | 2     | 0.004       | 0.058   | 0.521 | 0.912 | -0.965 | 1.081  | 691  |
| Horvath DNAmAA       | 1     | 0.021       | 0.175   | 0.306 | 0.566 | -0.425 | 0.775  | 782  |
|                      | 2     | 0.019       | 0.155   | 0.320 | 0.628 | -0.473 | 0.783  | 684  |
| Hannum DNAmAA        | 1     | 0.002       | 0.015   | 0.250 | 0.953 | -0.475 | 0.505  | 782  |
|                      | 2     | 0.002       | 0.015   | 0.262 | 0.955 | -0.499 | 0.529  | 684  |
| PhenoAge DNAmAA      | 1     | -0.036      | -0.330  | 0.332 | 0.320 | -0.983 | 0.322  | 782  |
|                      | 2     | -0.038      | -0.344  | 0.352 | 0.328 | -1.034 | 0.346  | 684  |
| GrimAge DNAmAA       | 1     | 0.010       | 0.065   | 0.222 | 0.771 | -0.371 | 0.500  | 782  |
|                      | 2     | -0.017      | -0.104  | 0.208 | 0.619 | -0.513 | 0.306  | 684  |
| DunedinPACE          | 1     | -0.087      | -0.019  | 0.007 | 0.010 | -0.033 | -0.004 | 865  |
|                      | 2     | -0.087      | -0.019  | 0.007 | 0.012 | -0.034 | -0.004 | 757  |
| <b>Women</b>         |       |             |         |       |       |        |        |      |
| 7-CpG DNAmAA         | 1     | 0.054       | 0.713   | 0.542 | 0.189 | -0.352 | 1.778  | 602  |
|                      | 2     | 0.088       | 1.185   | 0.725 | 0.103 | -0.241 | 2.612  | 357  |
| Horvath DNAmAA       | 1     | 0.025       | 0.205   | 0.415 | 0.621 | -0.611 | 1.021  | 400  |
|                      | 2     | 0.041       | 0.340   | 0.446 | 0.446 | -0.537 | 1.218  | 354  |
| Hannum DNAmAA        | 1     | -0.024      | -0.155  | 0.327 | 0.637 | -0.798 | 0.489  | 400  |
|                      | 2     | 0.001       | 0.007   | 0.350 | 0.984 | -0.682 | 0.695  | 354  |
| PhenoAge DNAmAA      | 1     | -0.051      | -0.476  | 0.468 | 0.310 | -1.396 | 0.444  | 400  |
|                      | 2     | -0.055      | -0.518  | 0.499 | 0.300 | -1.500 | 0.464  | 354  |
| GrimAge DNAmAA       | 1     | 0.018       | 0.103   | 0.278 | 0.713 | -0.444 | 0.649  | 400  |
|                      | 2     | -0.005      | -0.027  | 0.288 | 0.924 | -0.594 | 0.539  | 354  |
| DunedinPACE          | 1     | -0.083      | -0.017  | 0.010 | 0.081 | -0.035 | 0.002  | 447  |
|                      | 2     | -0.066      | -0.013  | 0.010 | 0.176 | -0.032 | 0.006  | 395  |
| <b>Men</b>           |       |             |         |       |       |        |        |      |
| 7-CpG DNAmAA         | 1     | -0.018      | -0.241  | 0.566 | 0.670 | -1.353 | 0.870  | 596  |
|                      | 2     | -0.078      | -1.062  | 0.752 | 0.159 | -2.542 | 0.418  | 334  |
| Horvath DNAmAA       | 1     | 0.001       | 0.007   | 0.439 | 0.987 | -0.856 | 0.871  | 382  |
|                      | 2     | -0.009      | -0.077  | 0.465 | 0.869 | -0.992 | 0.838  | 330  |
| Hannum DNAmAA        | 1     | 0.007       | 0.051   | 0.364 | 0.889 | -0.665 | 0.767  | 382  |
|                      | 2     | -0.006      | -0.044  | 0.396 | 0.912 | -0.823 | 0.735  | 330  |
| PhenoAge DNAmAA      | 1     | -0.027      | -0.246  | 0.471 | 0.602 | -1.172 | 0.680  | 382  |
|                      | 2     | -0.022      | -0.195  | 0.500 | 0.697 | -1.178 | 0.788  | 330  |
| GrimAge DNAmAA       | 1     | -0.031      | -0.184  | 0.309 | 0.552 | -0.793 | 0.424  | 382  |
|                      | 2     | -0.030      | -0.185  | 0.305 | 0.546 | -0.786 | 0.416  | 330  |
| DunedinPACE          | 1     | -0.119      | -0.026  | 0.011 | 0.015 | -0.047 | -0.005 | 418  |
|                      | 2     | -0.109      | -0.024  | 0.011 | 0.034 | -0.047 | -0.002 | 362  |

Note: St. = Standardized; SE = Standard Error; p = p-value; lowCI = lower 95% confidence interval; upCI = upper 95% confidence interval.

Supplementary Table 3: Linear regression analysis of epigenetic age estimates calculated by all available six epigenetic clocks on quartiles of Selenoprotein P in men and women. Model 1 is unadjusted. Model 2 is adjusted for chronological age, sex, BMI, smoking (packyears), and the first four genetic principal components (PC1 to PC4). The first quartile is used as reference.

| Clock           | Model | St. $\beta$ | $\beta$ | SE     | p     | lowCI | upCI   | n      |      |
|-----------------|-------|-------------|---------|--------|-------|-------|--------|--------|------|
| 7-CpG DNAmAA    | 1     | Q2          | -0.018  | -0.284 | 0.563 | 0.613 | -1.388 | 0.820  | 1168 |
|                 |       | Q3          | -0.033  | -0.525 | 0.567 | 0.354 | -1.637 | 0.587  | 1168 |
|                 |       | Q4          | 0.007   | 0.109  | 0.568 | 0.847 | -1.005 | 1.224  | 1168 |
|                 | 2     | Q2          | 0.051   | 0.771  | 0.734 | 0.294 | -0.671 | 2.213  | 674  |
|                 |       | Q3          | -0.001  | -0.020 | 0.753 | 0.979 | -1.497 | 1.458  | 674  |
|                 |       | Q4          | 0.022   | 0.348  | 0.764 | 0.649 | -1.152 | 1.848  | 674  |
| Horvath DNAmAA  | 1     | Q2          | 0.033   | 0.310  | 0.435 | 0.477 | -0.545 | 1.164  | 765  |
|                 |       | Q3          | -0.003  | -0.026 | 0.450 | 0.954 | -0.909 | 0.857  | 765  |
|                 |       | Q4          | 0.012   | 0.120  | 0.451 | 0.791 | -0.766 | 1.005  | 765  |
|                 | 2     | Q2          | 0.032   | 0.293  | 0.457 | 0.522 | -0.605 | 1.191  | 667  |
|                 |       | Q3          | 0.026   | 0.252  | 0.467 | 0.590 | -0.666 | 1.169  | 667  |
|                 |       | Q4          | 0.007   | 0.067  | 0.476 | 0.888 | -0.867 | 1.001  | 667  |
| Hannum DNAmAA   | 1     | Q2          | 0.111   | 0.857  | 0.354 | 0.016 | 0.162  | 1.551  | 765  |
|                 |       | Q3          | -0.023  | -0.184 | 0.366 | 0.616 | -0.901 | 0.534  | 765  |
|                 |       | Q4          | 0.004   | 0.031  | 0.367 | 0.932 | -0.688 | 0.751  | 765  |
|                 | 2     | Q2          | 0.132   | 1.002  | 0.372 | 0.007 | 0.273  | 1.732  | 667  |
|                 |       | Q3          | 0.011   | 0.086  | 0.380 | 0.821 | -0.659 | 0.831  | 667  |
|                 |       | Q4          | 0.012   | 0.098  | 0.386 | 0.801 | -0.661 | 0.857  | 667  |
| PhenoAge DNAmAA | 1     | Q2          | 0.024   | 0.252  | 0.475 | 0.596 | -0.681 | 1.184  | 765  |
|                 |       | Q3          | -0.024  | -0.255 | 0.491 | 0.604 | -1.219 | 0.709  | 765  |
|                 |       | Q4          | -0.016  | -0.177 | 0.492 | 0.719 | -1.144 | 0.790  | 765  |
|                 | 2     | Q2          | 0.026   | 0.269  | 0.505 | 0.594 | -0.722 | 1.261  | 667  |
|                 |       | Q3          | -0.027  | -0.287 | 0.516 | 0.578 | -1.300 | 0.726  | 667  |
|                 |       | Q4          | -0.039  | -0.417 | 0.525 | 0.427 | -1.449 | 0.614  | 667  |
| GrimAge DNAmAA  | 1     | Q2          | 0.033   | 0.224  | 0.314 | 0.476 | -0.393 | 0.841  | 765  |
|                 |       | Q3          | -0.071  | -0.514 | 0.325 | 0.114 | -1.152 | 0.124  | 765  |
|                 |       | Q4          | 0.004   | 0.028  | 0.326 | 0.932 | -0.612 | 0.667  | 765  |
|                 | 2     | Q2          | 0.032   | 0.220  | 0.298 | 0.460 | -0.365 | 0.806  | 667  |
|                 |       | Q3          | -0.048  | -0.345 | 0.305 | 0.258 | -0.943 | 0.254  | 667  |
|                 |       | Q4          | 0.002   | 0.015  | 0.310 | 0.962 | -0.595 | 0.624  | 667  |
| DunedinPACE     | 1     | Q2          | -0.076  | -0.018 | 0.010 | 0.078 | -0.039 | 0.002  | 848  |
|                 |       | Q3          | -0.065  | -0.016 | 0.011 | 0.125 | -0.038 | 0.005  | 848  |
|                 |       | Q4          | -0.096  | -0.024 | 0.011 | 0.024 | -0.045 | -0.003 | 848  |
|                 | 2     | Q2          | -0.074  | -0.018 | 0.011 | 0.089 | -0.039 | 0.003  | 740  |
|                 |       | Q3          | -0.067  | -0.017 | 0.011 | 0.119 | -0.038 | 0.004  | 740  |
|                 |       | Q4          | -0.115  | -0.030 | 0.011 | 0.007 | -0.051 | -0.008 | 740  |

Note: St. = Standardized; SE = Standard Error; p = p-value; lowCI = lower 95% confidence interval; upCI = upper 95% confidence interval.

Supplementary Table 4: Linear regression analysis of epigenetic age estimates calculated by all available six epigenetic clocks on quartiles of Selenoprotein P in the subgroup of women. Model 1 is unadjusted. Model 2 is adjusted for chronological age, sex, BMI, smoking (packyears), and the first four genetic principal components (PC1 to PC4). The first quartile is used as reference.

| Clock           | Model |    | St. $\beta$ | $\beta$ | SE    | p     | lowCI  | upCI   | n   |
|-----------------|-------|----|-------------|---------|-------|-------|--------|--------|-----|
| 7-CpG DNAmAA    | 1     | Q2 | 0.027       | 0.407   | 0.760 | 0.593 | -1.085 | 1.898  | 588 |
|                 |       | Q3 | 0.018       | 0.265   | 0.764 | 0.729 | -1.236 | 1.766  | 588 |
|                 |       | Q4 | 0.084       | 1.272   | 0.772 | 0.100 | -0.245 | 2.789  | 588 |
|                 | 2     | Q2 | 0.126       | 1.815   | 1.002 | 0.071 | -0.156 | 3.785  | 348 |
|                 |       | Q3 | 0.025       | 0.365   | 1.015 | 0.719 | -1.631 | 2.361  | 348 |
|                 |       | Q4 | 0.044       | 0.688   | 1.069 | 0.520 | -1.414 | 2.791  | 348 |
| Horvath DNAmAA  | 1     | Q2 | 0.096       | 0.877   | 0.589 | 0.137 | -0.281 | 2.036  | 391 |
|                 |       | Q3 | 0.083       | 0.786   | 0.603 | 0.194 | -0.400 | 1.972  | 391 |
|                 |       | Q4 | 0.061       | 0.603   | 0.622 | 0.333 | -0.620 | 1.826  | 391 |
|                 | 2     | Q2 | 0.045       | 0.412   | 0.633 | 0.516 | -0.833 | 1.657  | 345 |
|                 |       | Q3 | 0.072       | 0.669   | 0.638 | 0.295 | -0.586 | 1.925  | 345 |
|                 |       | Q4 | 0.035       | 0.345   | 0.675 | 0.609 | -0.982 | 1.673  | 345 |
| Hannum DNAmAA   | 1     | Q2 | 0.137       | 0.993   | 0.463 | 0.033 | 0.083  | 1.904  | 391 |
|                 |       | Q3 | 0.036       | 0.271   | 0.474 | 0.568 | -0.661 | 1.203  | 391 |
|                 |       | Q4 | 0.021       | 0.165   | 0.489 | 0.736 | -0.796 | 1.126  | 391 |
|                 | 2     | Q2 | 0.163       | 1.162   | 0.493 | 0.019 | 0.192  | 2.131  | 345 |
|                 |       | Q3 | 0.050       | 0.362   | 0.497 | 0.466 | -0.615 | 1.340  | 345 |
|                 |       | Q4 | 0.025       | 0.192   | 0.525 | 0.716 | -0.842 | 1.225  | 345 |
| PhenoAge DNAmAA | 1     | Q2 | 0.075       | 0.772   | 0.665 | 0.247 | -0.536 | 2.080  | 391 |
|                 |       | Q3 | 0.006       | 0.069   | 0.681 | 0.920 | -1.271 | 1.408  | 391 |
|                 |       | Q4 | 0.037       | 0.418   | 0.703 | 0.552 | -0.964 | 1.799  | 391 |
|                 | 2     | Q2 | 0.055       | 0.567   | 0.709 | 0.424 | -0.827 | 1.962  | 345 |
|                 |       | Q3 | -0.005      | -0.053  | 0.715 | 0.941 | -1.459 | 1.353  | 345 |
|                 |       | Q4 | 0.011       | 0.129   | 0.756 | 0.865 | -1.358 | 1.616  | 345 |
| GrimAge DNAmAA  | 1     | Q2 | 0.054       | 0.329   | 0.394 | 0.405 | -0.446 | 1.103  | 391 |
|                 |       | Q3 | -0.068      | -0.433  | 0.403 | 0.284 | -1.226 | 0.360  | 391 |
|                 |       | Q4 | -0.001      | -0.009  | 0.416 | 0.984 | -0.826 | 0.809  | 391 |
|                 | 2     | Q2 | 0.051       | 0.319   | 0.407 | 0.434 | -0.482 | 1.120  | 345 |
|                 |       | Q3 | -0.079      | -0.505  | 0.411 | 0.219 | -1.313 | 0.303  | 345 |
|                 |       | Q4 | -0.016      | -0.112  | 0.434 | 0.796 | -0.966 | 0.742  | 345 |
| DunedinPACE     | 1     | Q2 | -0.101      | -0.023  | 0.014 | 0.095 | -0.049 | 0.004  | 438 |
|                 |       | Q3 | -0.058      | -0.013  | 0.014 | 0.335 | -0.040 | 0.014  | 438 |
|                 |       | Q4 | -0.108      | -0.026  | 0.014 | 0.068 | -0.054 | 0.002  | 438 |
|                 | 2     | Q2 | -0.086      | -0.019  | 0.014 | 0.161 | -0.046 | 0.008  | 386 |
|                 |       | Q3 | -0.095      | -0.022  | 0.014 | 0.119 | -0.049 | 0.006  | 386 |
|                 |       | Q4 | -0.133      | -0.032  | 0.015 | 0.028 | -0.061 | -0.004 | 386 |

Note: St. = Standardized; SE = Standard Error; p = p-value; lowCI = lower 95% confidence interval; upCI = upper 95% confidence interval.

Supplementary Table 5: Linear regression analysis of epigenetic age estimates calculated by all available six epigenetic clocks on quartiles of Selenoprotein P in the subgroup of men. Model 1 is unadjusted. Model 2 is adjusted for chronological age, sex, BMI, smoking (packyears), and the first four genetic principal components (PC1 to PC4). The first quartile is used as reference.

| Clock           | Model | St. $\beta$ | $\beta$ | SE     | p     | lowCI | upCI   | n     |     |
|-----------------|-------|-------------|---------|--------|-------|-------|--------|-------|-----|
| 7-CpG DNAmAA    | 1     | Q2          | -0.054  | -0.865 | 0.811 | 0.286 | -2.458 | 0.727 | 580 |
|                 |       | Q3          | -0.074  | -1.202 | 0.818 | 0.142 | -2.809 | 0.405 | 580 |
|                 |       | Q4          | -0.062  | -1.002 | 0.812 | 0.218 | -2.597 | 0.594 | 580 |
|                 | 2     | Q2          | -0.017  | -0.261 | 1.097 | 0.812 | -2.418 | 1.897 | 326 |
|                 |       | Q3          | -0.033  | -0.527 | 1.137 | 0.643 | -2.764 | 1.709 | 326 |
|                 |       | Q4          | 0.010   | 0.153  | 1.111 | 0.890 | -2.033 | 2.340 | 326 |
| Horvath DNAmAA  | 1     | Q2          | -0.029  | -0.272 | 0.623 | 0.663 | -1.498 | 0.954 | 374 |
|                 |       | Q3          | -0.082  | -0.829 | 0.652 | 0.204 | -2.110 | 0.452 | 374 |
|                 |       | Q4          | -0.050  | -0.482 | 0.635 | 0.449 | -1.730 | 0.767 | 374 |
|                 | 2     | Q2          | 0.011   | 0.102  | 0.677 | 0.880 | -1.230 | 1.433 | 322 |
|                 |       | Q3          | -0.037  | -0.358 | 0.701 | 0.610 | -1.736 | 1.021 | 322 |
|                 |       | Q4          | -0.033  | -0.312 | 0.686 | 0.649 | -1.663 | 1.038 | 322 |
| Hannum DNAmAA   | 1     | Q2          | 0.093   | 0.730  | 0.513 | 0.156 | -0.279 | 1.739 | 374 |
|                 |       | Q3          | -0.072  | -0.601 | 0.536 | 0.263 | -1.656 | 0.453 | 374 |
|                 |       | Q4          | -0.027  | -0.216 | 0.522 | 0.679 | -1.244 | 0.811 | 374 |
|                 | 2     | Q2          | 0.113   | 0.882  | 0.571 | 0.124 | -0.242 | 2.007 | 322 |
|                 |       | Q3          | -0.023  | -0.192 | 0.592 | 0.746 | -1.356 | 0.972 | 322 |
|                 |       | Q4          | -0.018  | -0.146 | 0.579 | 0.802 | -1.286 | 0.994 | 322 |
| PhenoAge DNAmAA | 1     | Q2          | -0.028  | -0.288 | 0.675 | 0.670 | -1.616 | 1.040 | 374 |
|                 |       | Q3          | -0.050  | -0.544 | 0.706 | 0.441 | -1.932 | 0.844 | 374 |
|                 |       | Q4          | -0.078  | -0.820 | 0.688 | 0.234 | -2.172 | 0.532 | 374 |
|                 | 2     | Q2          | -0.005  | -0.046 | 0.733 | 0.950 | -1.488 | 1.395 | 322 |
|                 |       | Q3          | -0.058  | -0.611 | 0.758 | 0.421 | -2.103 | 0.881 | 322 |
|                 |       | Q4          | -0.100  | -1.039 | 0.743 | 0.163 | -2.501 | 0.422 | 322 |
| GrimAge DNAmAA  | 1     | Q2          | 0.020   | 0.134  | 0.441 | 0.761 | -0.733 | 1.001 | 374 |
|                 |       | Q3          | -0.067  | -0.482 | 0.461 | 0.297 | -1.388 | 0.425 | 374 |
|                 |       | Q4          | -0.012  | -0.082 | 0.449 | 0.855 | -0.965 | 0.801 | 374 |
|                 | 2     | Q2          | 0.031   | 0.209  | 0.446 | 0.640 | -0.669 | 1.087 | 322 |
|                 |       | Q3          | -0.024  | -0.166 | 0.462 | 0.719 | -1.075 | 0.743 | 322 |
|                 |       | Q4          | 0.031   | 0.215  | 0.453 | 0.636 | -0.676 | 1.105 | 322 |
| DunedinPACE     | 1     | Q2          | -0.042  | -0.011 | 0.015 | 0.489 | -0.041 | 0.019 | 410 |
|                 |       | Q3          | -0.055  | -0.015 | 0.016 | 0.361 | -0.046 | 0.017 | 410 |
|                 |       | Q4          | -0.102  | -0.025 | 0.015 | 0.098 | -0.055 | 0.005 | 410 |
|                 | 2     | Q2          | -0.048  | -0.012 | 0.017 | 0.463 | -0.045 | 0.021 | 354 |
|                 |       | Q3          | -0.036  | -0.010 | 0.017 | 0.578 | -0.044 | 0.024 | 354 |
|                 |       | Q4          | -0.079  | -0.020 | 0.017 | 0.222 | -0.053 | 0.012 | 354 |

Note: St. = Standardized; SE = Standard Error; p = p-value; lowCI = lower 95% confidence interval; upCI = upper 95% confidence interval.

Supplementary Table 6: Linear regression analysis of epigenetic age estimates calculated by all available six epigenetic clocks on quartiles of GPx3 intensity in men and women. Model 1 is unadjusted. Model 2 is adjusted for chronological age, sex, BMI, smoking (packyears), and the first four genetic principal components (PC1 to PC4). The first quartile is used as reference.

| Clock           | Model |    | St. $\beta$ | $\beta$ | SE    | p     | lowCI  | upCI   | n    |
|-----------------|-------|----|-------------|---------|-------|-------|--------|--------|------|
| 7-CpG DNAmAA    | 1     | Q2 | -0,027      | -0,432  | 0,594 | 0,467 | -1,598 | 0,734  | 1066 |
|                 |       | Q3 | -0,024      | -0,390  | 0,595 | 0,513 | -1,558 | 0,778  | 1066 |
|                 |       | Q4 | -0,040      | -0,634  | 0,593 | 0,285 | -1,797 | 0,528  | 1066 |
|                 | 2     | Q2 | 0,012       | 0,187   | 0,791 | 0,813 | -1,365 | 1,740  | 614  |
|                 |       | Q3 | 0,008       | 0,127   | 0,805 | 0,875 | -1,453 | 1,707  | 614  |
|                 |       | Q4 | -0,042      | -0,670  | 0,801 | 0,403 | -2,243 | 0,903  | 614  |
| Horvath DNAmAA  | 1     | Q2 | -0,033      | -0,322  | 0,462 | 0,487 | -1,228 | 0,585  | 689  |
|                 |       | Q3 | -0,076      | -0,772  | 0,471 | 0,102 | -1,697 | 0,153  | 689  |
|                 |       | Q4 | -0,064      | -0,628  | 0,458 | 0,171 | -1,527 | 0,272  | 689  |
|                 | 2     | Q2 | -0,016      | -0,151  | 0,478 | 0,753 | -1,090 | 0,788  | 608  |
|                 |       | Q3 | -0,048      | -0,475  | 0,489 | 0,332 | -1,436 | 0,486  | 608  |
|                 |       | Q4 | -0,030      | -0,284  | 0,485 | 0,558 | -1,236 | 0,667  | 608  |
| Hannum DNAmAA   | 1     | Q2 | 0,009       | 0,072   | 0,377 | 0,848 | -0,668 | 0,813  | 689  |
|                 |       | Q3 | -0,017      | -0,140  | 0,385 | 0,716 | -0,895 | 0,615  | 689  |
|                 |       | Q4 | -0,059      | -0,472  | 0,374 | 0,208 | -1,206 | 0,263  | 689  |
|                 | 2     | Q2 | 0,007       | 0,055   | 0,390 | 0,887 | -0,712 | 0,822  | 608  |
|                 |       | Q3 | 0,002       | 0,017   | 0,399 | 0,967 | -0,768 | 0,801  | 608  |
|                 |       | Q4 | -0,021      | -0,166  | 0,396 | 0,675 | -0,943 | 0,611  | 608  |
| PhenoAge DNAmAA | 1     | Q2 | -0,034      | -0,365  | 0,498 | 0,464 | -1,343 | 0,613  | 689  |
|                 |       | Q3 | -0,090      | -0,989  | 0,508 | 0,052 | -1,986 | 0,008  | 689  |
|                 |       | Q4 | -0,098      | -1,028  | 0,494 | 0,038 | -1,998 | -0,059 | 689  |
|                 | 2     | Q2 | -0,031      | -0,324  | 0,521 | 0,534 | -1,346 | 0,699  | 608  |
|                 |       | Q3 | -0,102      | -1,087  | 0,532 | 0,042 | -2,133 | -0,042 | 608  |
|                 |       | Q4 | -0,061      | -0,629  | 0,527 | 0,233 | -1,665 | 0,406  | 608  |
| GrimAge DNAmAA  | 1     | Q2 | 0,004       | 0,026   | 0,332 | 0,937 | -0,625 | 0,677  | 689  |
|                 |       | Q3 | -0,059      | -0,430  | 0,338 | 0,203 | -1,094 | 0,233  | 689  |
|                 |       | Q4 | -0,176      | -1,246  | 0,329 | 0,000 | -1,892 | -0,601 | 689  |
|                 | 2     | Q2 | -0,044      | -0,313  | 0,310 | 0,313 | -0,923 | 0,296  | 608  |
|                 |       | Q3 | -0,085      | -0,628  | 0,318 | 0,048 | -1,252 | -0,005 | 608  |
|                 |       | Q4 | -0,136      | -0,975  | 0,315 | 0,002 | -1,593 | -0,358 | 608  |
| DunedinPACE     | 1     | Q2 | -0,006      | -0,002  | 0,011 | 0,885 | -0,023 | 0,020  | 764  |
|                 |       | Q3 | -0,044      | -0,011  | 0,011 | 0,309 | -0,033 | 0,010  | 764  |
|                 |       | Q4 | -0,218      | -0,054  | 0,011 | 0,000 | -0,076 | -0,033 | 764  |
|                 | 2     | Q2 | -0,011      | -0,003  | 0,011 | 0,801 | -0,024 | 0,019  | 674  |
|                 |       | Q3 | -0,039      | -0,010  | 0,011 | 0,369 | -0,032 | 0,012  | 674  |
|                 |       | Q4 | -0,146      | -0,037  | 0,011 | 0,001 | -0,059 | -0,015 | 674  |

Note: St. = Standardized; SE = Standard Error; p = p-value; lowCI = lower 95% confidence interval; upCI = upper 95% confidence interval.



Supplementary Table 7: Linear regression analysis of epigenetic age estimates calculated by all available six epigenetic clocks on quartiles of GPx3 intensity in the subgroup of women. Model 1 is unadjusted. Model 2 is adjusted for chronological age, sex, BMI, smoking (packyears), and the first four genetic principal components (PC1 to PC4). The first quartile is used as reference.

| Clock           | Model |    | St. $\beta$ | $\beta$ | SE    | p     | lowCI  | upCI   | n   |
|-----------------|-------|----|-------------|---------|-------|-------|--------|--------|-----|
| 7-CpG DNAmAA    | 1     | Q2 | -0,115      | -1,804  | 0,832 | 0,031 | -3,439 | -0,170 | 548 |
|                 |       | Q3 | -0,076      | -1,159  | 0,814 | 0,155 | -2,758 | 0,440  | 548 |
|                 |       | Q4 | -0,043      | -0,638  | 0,793 | 0,421 | -2,195 | 0,919  | 548 |
|                 | 2     | Q2 | -0,052      | -0,840  | 1,124 | 0,455 | -3,051 | 1,372  | 324 |
|                 |       | Q3 | 0,012       | 0,198   | 1,136 | 0,862 | -2,038 | 2,433  | 324 |
|                 |       | Q4 | -0,028      | -0,406  | 1,058 | 0,701 | -2,487 | 1,675  | 324 |
| Horvath DNAmAA  | 1     | Q2 | -0,012      | -0,120  | 0,650 | 0,853 | -1,398 | 1,157  | 362 |
|                 |       | Q3 | -0,024      | -0,242  | 0,666 | 0,717 | -1,552 | 1,068  | 362 |
|                 |       | Q4 | 0,016       | 0,144   | 0,604 | 0,812 | -1,044 | 1,332  | 362 |
|                 | 2     | Q2 | 0,007       | 0,074   | 0,693 | 0,915 | -1,289 | 1,438  | 321 |
|                 |       | Q3 | 0,016       | 0,165   | 0,708 | 0,816 | -1,229 | 1,559  | 321 |
|                 |       | Q4 | 0,055       | 0,493   | 0,652 | 0,451 | -0,791 | 1,776  | 321 |
| Hannum DNAmAA   | 1     | Q2 | 0,019       | 0,141   | 0,493 | 0,774 | -0,828 | 1,111  | 362 |
|                 |       | Q3 | 0,002       | 0,016   | 0,505 | 0,974 | -0,977 | 1,010  | 362 |
|                 |       | Q4 | -0,025      | -0,169  | 0,458 | 0,713 | -1,070 | 0,733  | 362 |
|                 | 2     | Q2 | 0,061       | 0,452   | 0,521 | 0,387 | -0,574 | 1,477  | 321 |
|                 |       | Q3 | 0,058       | 0,448   | 0,533 | 0,401 | -0,600 | 1,496  | 321 |
|                 |       | Q4 | 0,009       | 0,058   | 0,491 | 0,906 | -0,907 | 1,023  | 321 |
| PhenoAge DNAmAA | 1     | Q2 | -0,032      | -0,348  | 0,711 | 0,625 | -1,746 | 1,051  | 362 |
|                 |       | Q3 | -0,039      | -0,436  | 0,729 | 0,550 | -1,869 | 0,998  | 362 |
|                 |       | Q4 | -0,069      | -0,676  | 0,661 | 0,307 | -1,976 | 0,624  | 362 |
|                 | 2     | Q2 | -0,048      | -0,519  | 0,751 | 0,490 | -1,998 | 0,959  | 321 |
|                 |       | Q3 | -0,072      | -0,801  | 0,768 | 0,298 | -2,312 | 0,711  | 321 |
|                 |       | Q4 | -0,043      | -0,417  | 0,707 | 0,555 | -1,809 | 0,974  | 321 |
| GrimAge DNAmAA  | 1     | Q2 | -0,016      | -0,106  | 0,426 | 0,804 | -0,943 | 0,731  | 362 |
|                 |       | Q3 | -0,017      | -0,112  | 0,436 | 0,797 | -0,971 | 0,746  | 362 |
|                 |       | Q4 | -0,131      | -0,777  | 0,396 | 0,050 | -1,555 | 0,002  | 362 |
|                 | 2     | Q2 | -0,066      | -0,439  | 0,437 | 0,316 | -1,300 | 0,421  | 321 |
|                 |       | Q3 | -0,068      | -0,469  | 0,447 | 0,295 | -1,348 | 0,411  | 321 |
|                 |       | Q4 | -0,135      | -0,815  | 0,412 | 0,049 | -1,625 | -0,005 | 321 |
| DunedinPACE     | 1     | Q2 | -0,095      | -0,022  | 0,014 | 0,114 | -0,050 | 0,005  | 407 |
|                 |       | Q3 | -0,073      | -0,018  | 0,014 | 0,221 | -0,046 | 0,011  | 407 |
|                 |       | Q4 | -0,308      | -0,067  | 0,013 | 0,000 | -0,093 | -0,041 | 407 |
|                 | 2     | Q2 | -0,096      | -0,023  | 0,014 | 0,113 | -0,051 | 0,005  | 361 |
|                 |       | Q3 | -0,089      | -0,021  | 0,014 | 0,140 | -0,050 | 0,007  | 361 |
|                 |       | Q4 | -0,234      | -0,051  | 0,014 | 0,000 | -0,078 | -0,024 | 361 |

Note: St. = Standardized; SE = Standard Error; p = p-value; lowCI = lower 95% confidence interval; upCI = upper 95% confidence interval.

Supplementary Table 8: Linear regression analysis of epigenetic age estimates calculated by all available six epigenetic clocks on quartiles of GPx3 intensity in the subgroup of men. Model 1 is unadjusted. Model 2 is adjusted for chronological age, sex, BMI, smoking (packyears), and the first four genetic principal components (PC1 to PC4). The first quartile is used as reference.

| Clock           | Model |    | St. $\beta$ | $\beta$ | SE    | p     | lowCI  | upCI   | n   |
|-----------------|-------|----|-------------|---------|-------|-------|--------|--------|-----|
| 7-CpG DNAmAA    | 1     | Q2 | 0,055       | 0,855   | 0,826 | 0,301 | -0,767 | 2,478  | 518 |
|                 |       | Q3 | 0,037       | 0,608   | 0,849 | 0,474 | -1,060 | 2,277  | 518 |
|                 |       | Q4 | -0,020      | -0,343  | 0,874 | 0,695 | -2,059 | 1,373  | 518 |
|                 | 2     | Q2 | 0,064       | 0,992   | 1,124 | 0,378 | -1,221 | 3,205  | 290 |
|                 |       | Q3 | -0,014      | -0,221  | 1,160 | 0,849 | -2,504 | 2,063  | 290 |
|                 |       | Q4 | -0,068      | -1,196  | 1,248 | 0,338 | -3,652 | 1,260  | 290 |
| Horvath DNAmAA  | 1     | Q2 | -0,054      | -0,510  | 0,635 | 0,423 | -1,760 | 0,740  | 327 |
|                 |       | Q3 | -0,134      | -1,296  | 0,645 | 0,045 | -2,564 | -0,028 | 327 |
|                 |       | Q4 | -0,093      | -0,999  | 0,696 | 0,152 | -2,369 | 0,371  | 327 |
|                 | 2     | Q2 | -0,036      | -0,324  | 0,667 | 0,628 | -1,637 | 0,990  | 287 |
|                 |       | Q3 | -0,121      | -1,127  | 0,688 | 0,103 | -2,482 | 0,227  | 287 |
|                 |       | Q4 | -0,124      | -1,296  | 0,741 | 0,082 | -2,756 | 0,163  | 287 |
| Hannum DNAmAA   | 1     | Q2 | 0,001       | 0,008   | 0,546 | 0,988 | -1,065 | 1,081  | 327 |
|                 |       | Q3 | -0,038      | -0,317  | 0,554 | 0,567 | -1,406 | 0,772  | 327 |
|                 |       | Q4 | -0,021      | -0,190  | 0,598 | 0,750 | -1,367 | 0,986  | 327 |
|                 | 2     | Q2 | -0,037      | -0,299  | 0,594 | 0,615 | -1,467 | 0,870  | 287 |
|                 |       | Q3 | -0,047      | -0,385  | 0,612 | 0,530 | -1,591 | 0,820  | 287 |
|                 |       | Q4 | -0,040      | -0,366  | 0,659 | 0,580 | -1,664 | 0,932  | 287 |
| PhenoAge DNAmAA | 1     | Q2 | -0,037      | -0,381  | 0,694 | 0,584 | -1,746 | 0,985  | 327 |
|                 |       | Q3 | -0,143      | -1,514  | 0,704 | 0,032 | -2,899 | -0,128 | 327 |
|                 |       | Q4 | -0,094      | -1,101  | 0,761 | 0,149 | -2,598 | 0,395  | 327 |
|                 | 2     | Q2 | -0,010      | -0,095  | 0,729 | 0,896 | -1,531 | 1,341  | 287 |
|                 |       | Q3 | -0,145      | -1,489  | 0,752 | 0,049 | -2,970 | -0,007 | 287 |
|                 |       | Q4 | -0,076      | -0,873  | 0,810 | 0,282 | -2,469 | 0,722  | 287 |
| GrimAge DNAmAA  | 1     | Q2 | 0,022       | 0,152   | 0,457 | 0,740 | -0,747 | 1,051  | 327 |
|                 |       | Q3 | -0,109      | -0,763  | 0,464 | 0,101 | -1,675 | 0,149  | 327 |
|                 |       | Q4 | -0,137      | -1,060  | 0,501 | 0,035 | -2,045 | -0,075 | 327 |
|                 | 2     | Q2 | -0,035      | -0,240  | 0,447 | 0,592 | -1,121 | 0,640  | 287 |
|                 |       | Q3 | -0,126      | -0,873  | 0,461 | 0,059 | -1,781 | 0,035  | 287 |
|                 |       | Q4 | -0,147      | -1,146  | 0,497 | 0,022 | -2,124 | -0,168 | 287 |
| DunedinPACE     | 1     | Q2 | 0,080       | 0,020   | 0,016 | 0,209 | -0,011 | 0,051  | 357 |
|                 |       | Q3 | -0,015      | -0,004  | 0,016 | 0,809 | -0,036 | 0,028  | 357 |
|                 |       | Q4 | -0,080      | -0,022  | 0,017 | 0,200 | -0,056 | 0,012  | 357 |
|                 | 2     | Q2 | 0,064       | 0,016   | 0,017 | 0,345 | -0,017 | 0,049  | 313 |
|                 |       | Q3 | 0,006       | 0,001   | 0,017 | 0,934 | -0,033 | 0,036  | 313 |
|                 |       | Q4 | -0,061      | -0,017  | 0,018 | 0,354 | -0,053 | 0,019  | 313 |

Note: St. = Standardized; SE = Standard Error; p = p-value; lowCI = lower 95% confidence interval; upCI = upper 95% confidence interval.

Figures

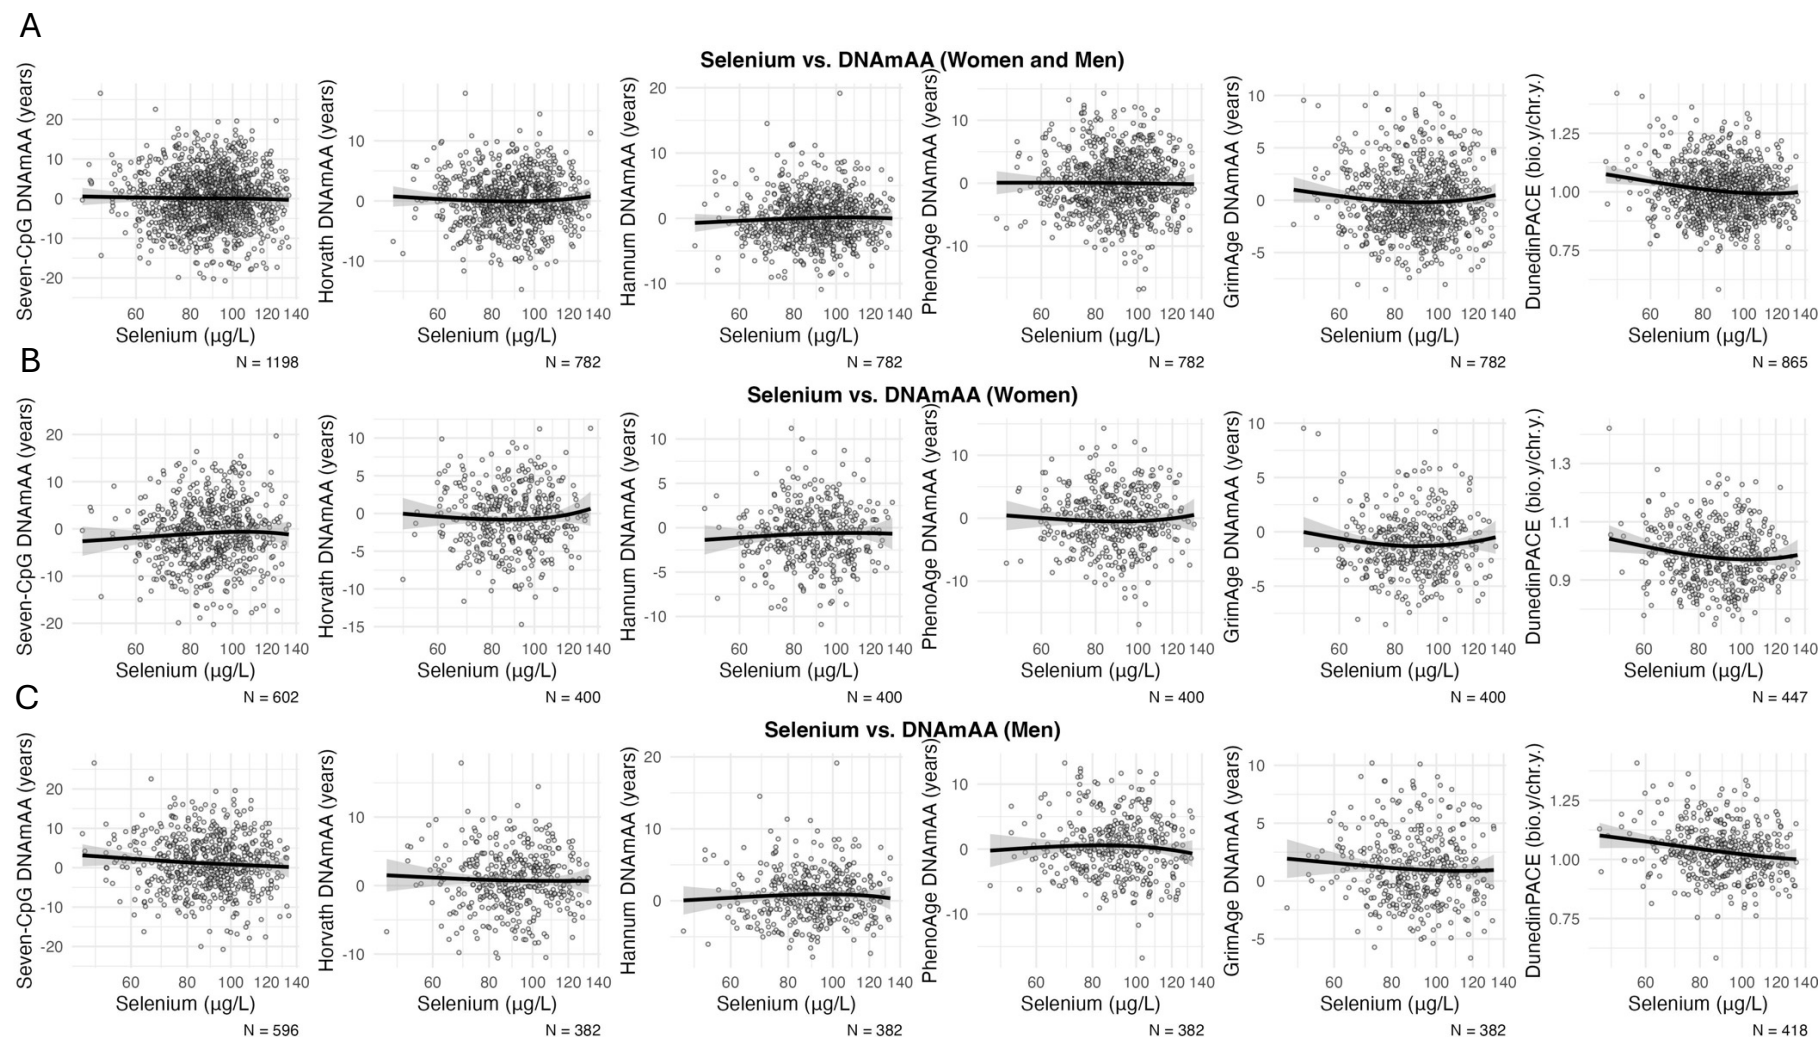

Supplementary Figure 1: Scatterplots of serum selenium levels and biological age estimators calculated from all six available epigenetic clocks in women and men (A) as well as in the all-women (B) and all-men (C) subgroup. The x-axis is log-scaled. All available participants of the older age group are included.

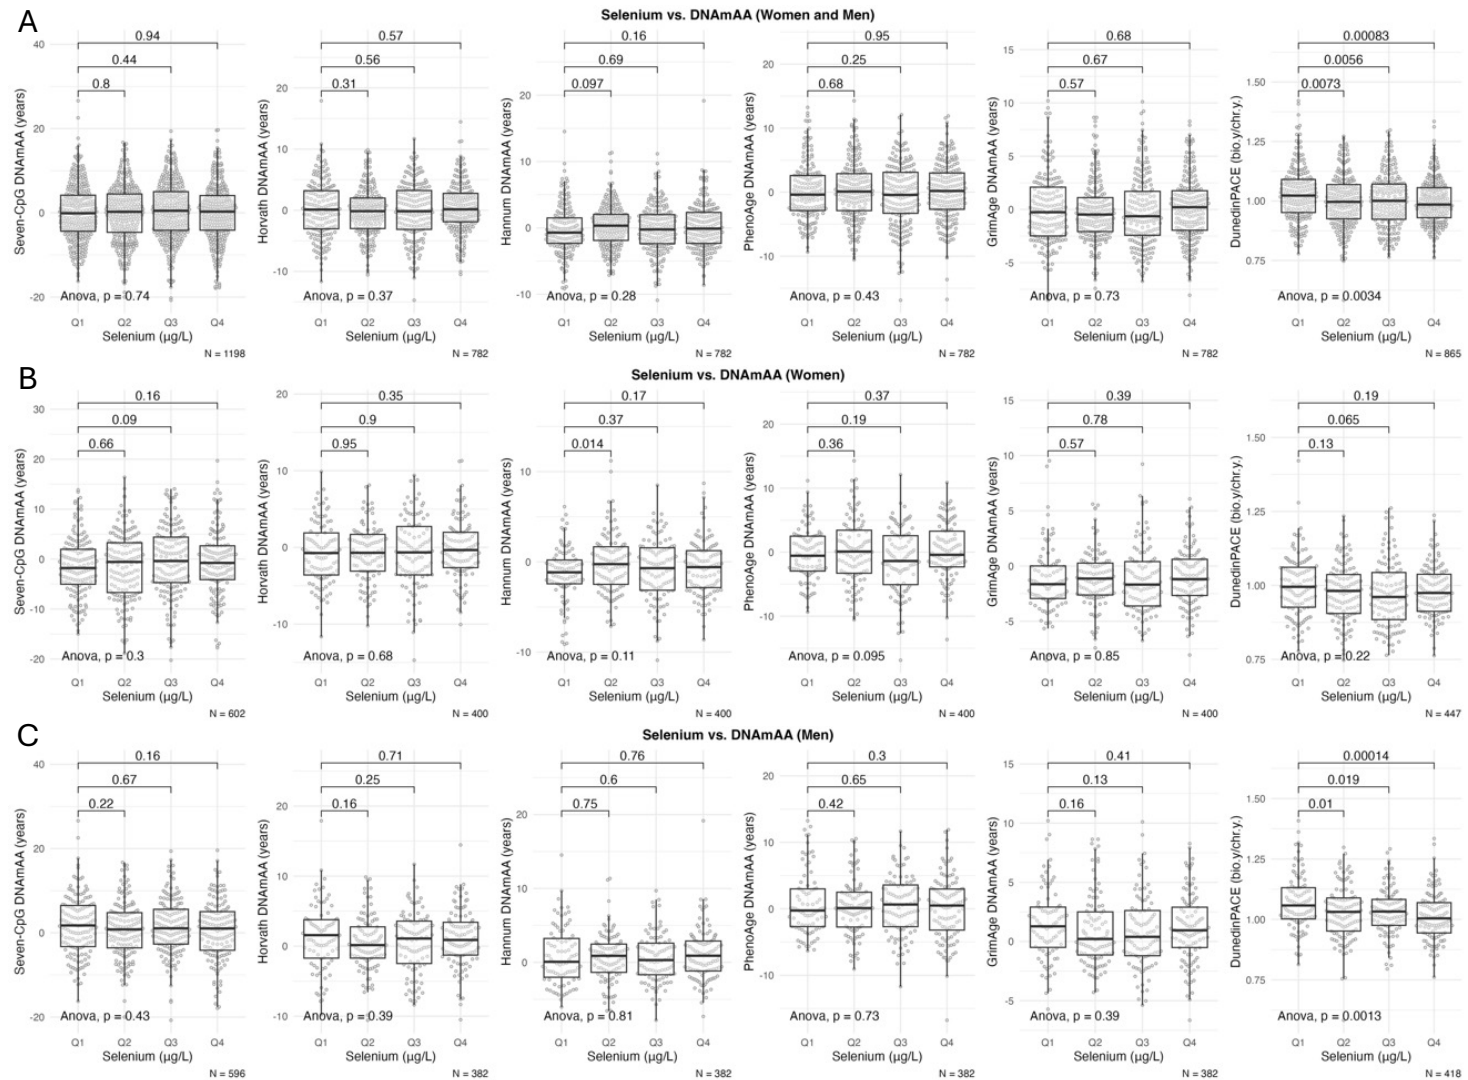

Supplementary Table 2: Boxplots of biological age estimators calculated by all six available epigenetic clocks stratified serum selenium status (deficient vs. sufficient) in men and women (A), women (B) and men (C). Statistical significance of difference between group means was assessed by t-test.

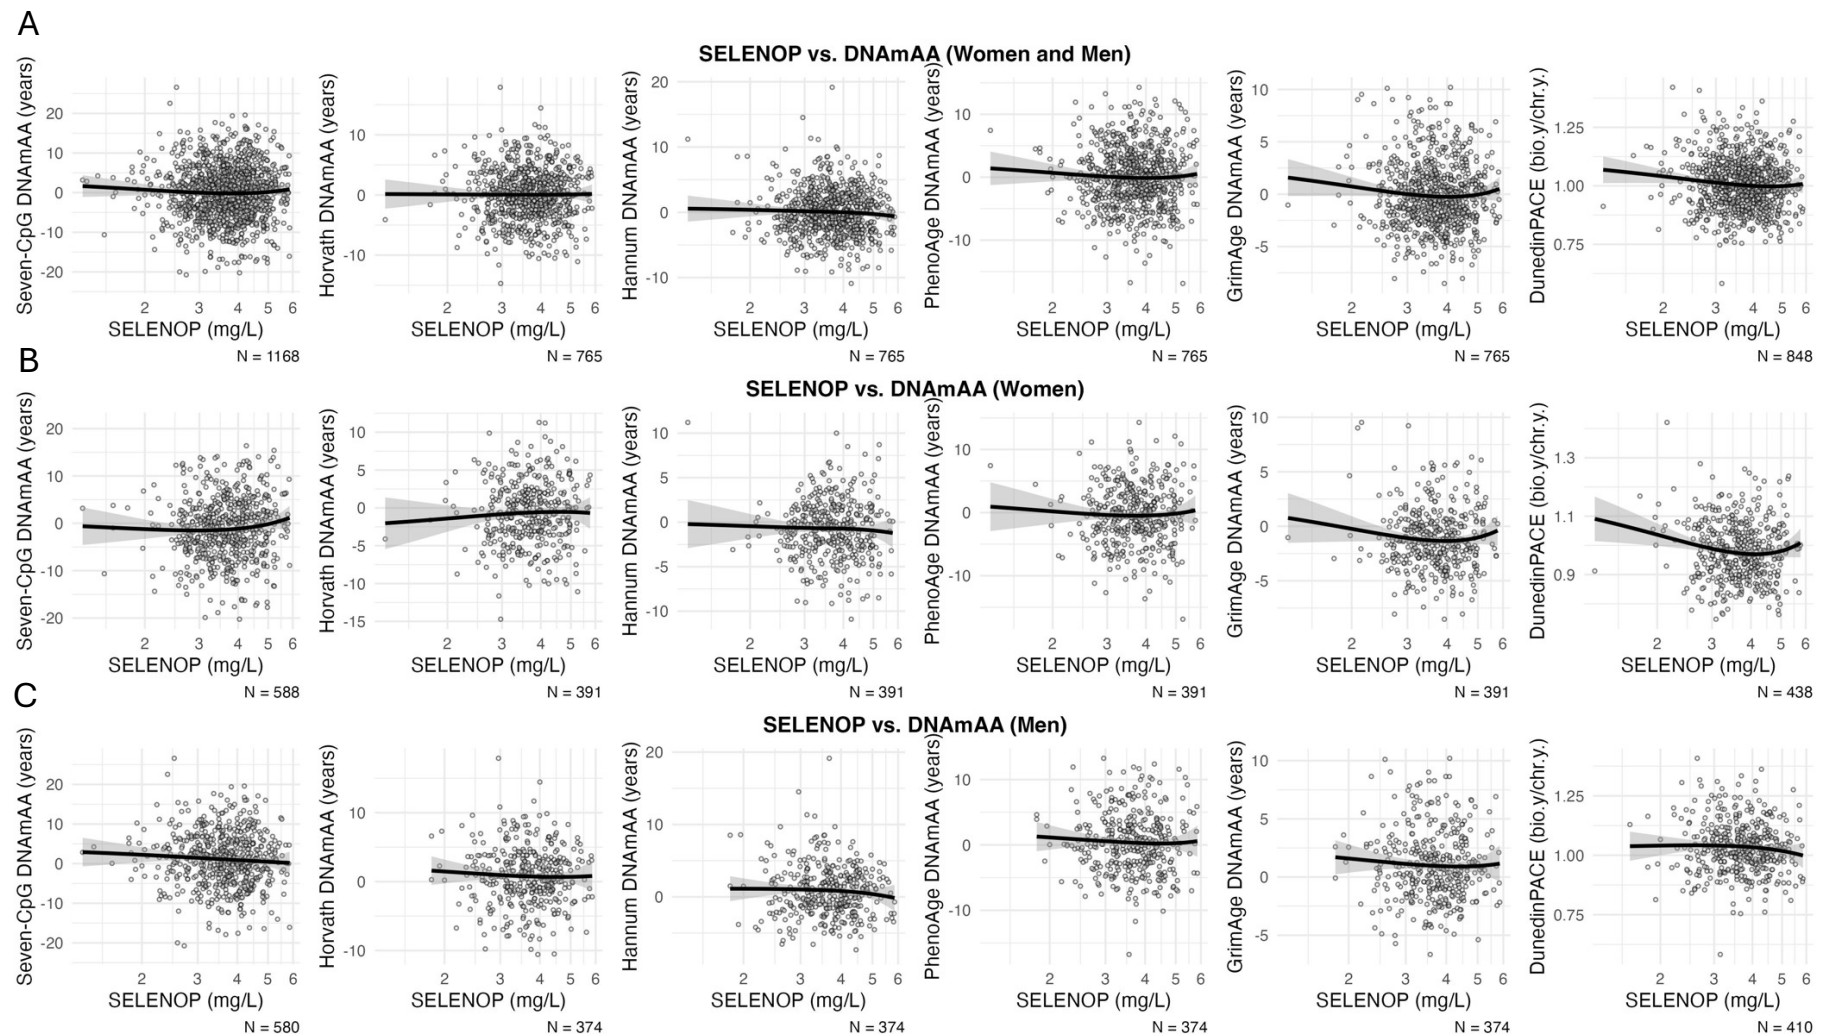

Supplementary Figure 3: Scatterplots of selenoprotein P levels and biological age estimators calculated from all six available epigenetic clocks in women and men (A) as well as in the all-women (B) and all-men (C) subgroup. The x-axis is log-scaled. All available participants of the older age group are included.

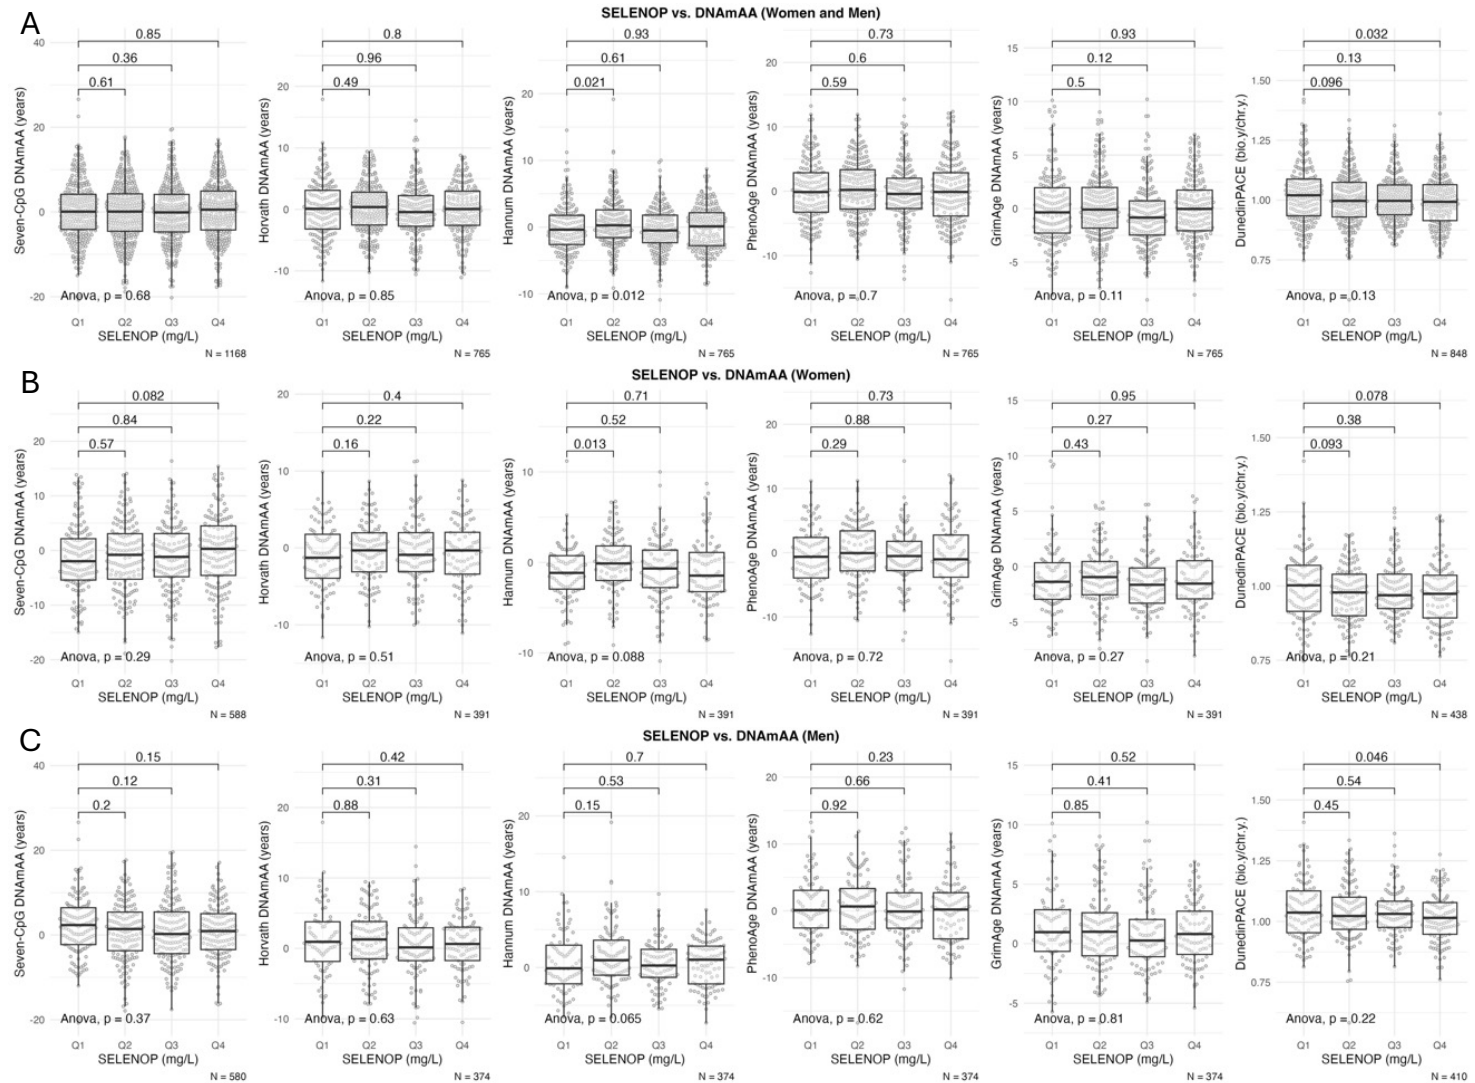

Supplementary Figure 4: Boxplots of biological age estimators calculated by all six available epigenetic clocks stratified by quartiles of selenoprotein P in men and women (A), women (B) and men (C). Statistical significance of difference between group means was assessed by t-test.

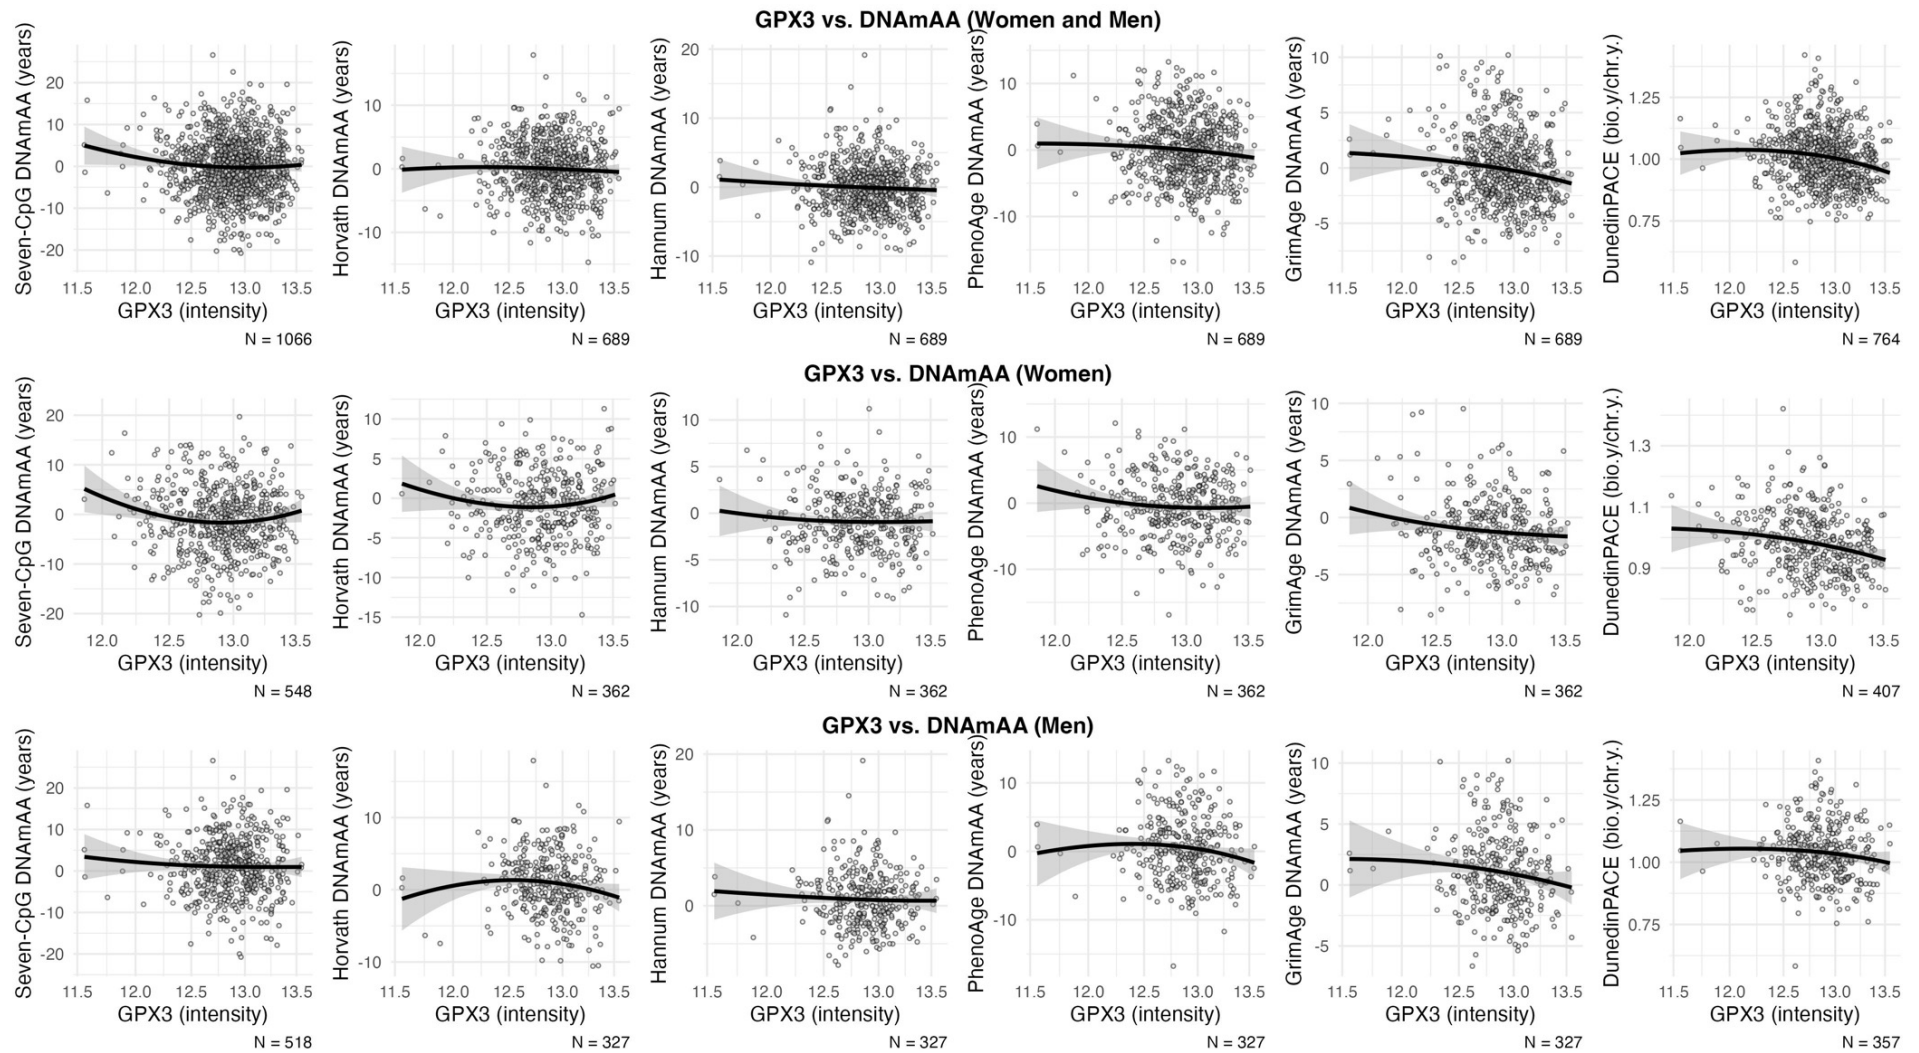

Supplementary Figure 3: Scatterplots of GPx3 intensity and biological age estimators calculated from all six available epigenetic clocks in women and men (A) as well as in the all-women (B) and all-me (C) subgroup. The x-axis is log-scaled. All available participants of the older age group are included.

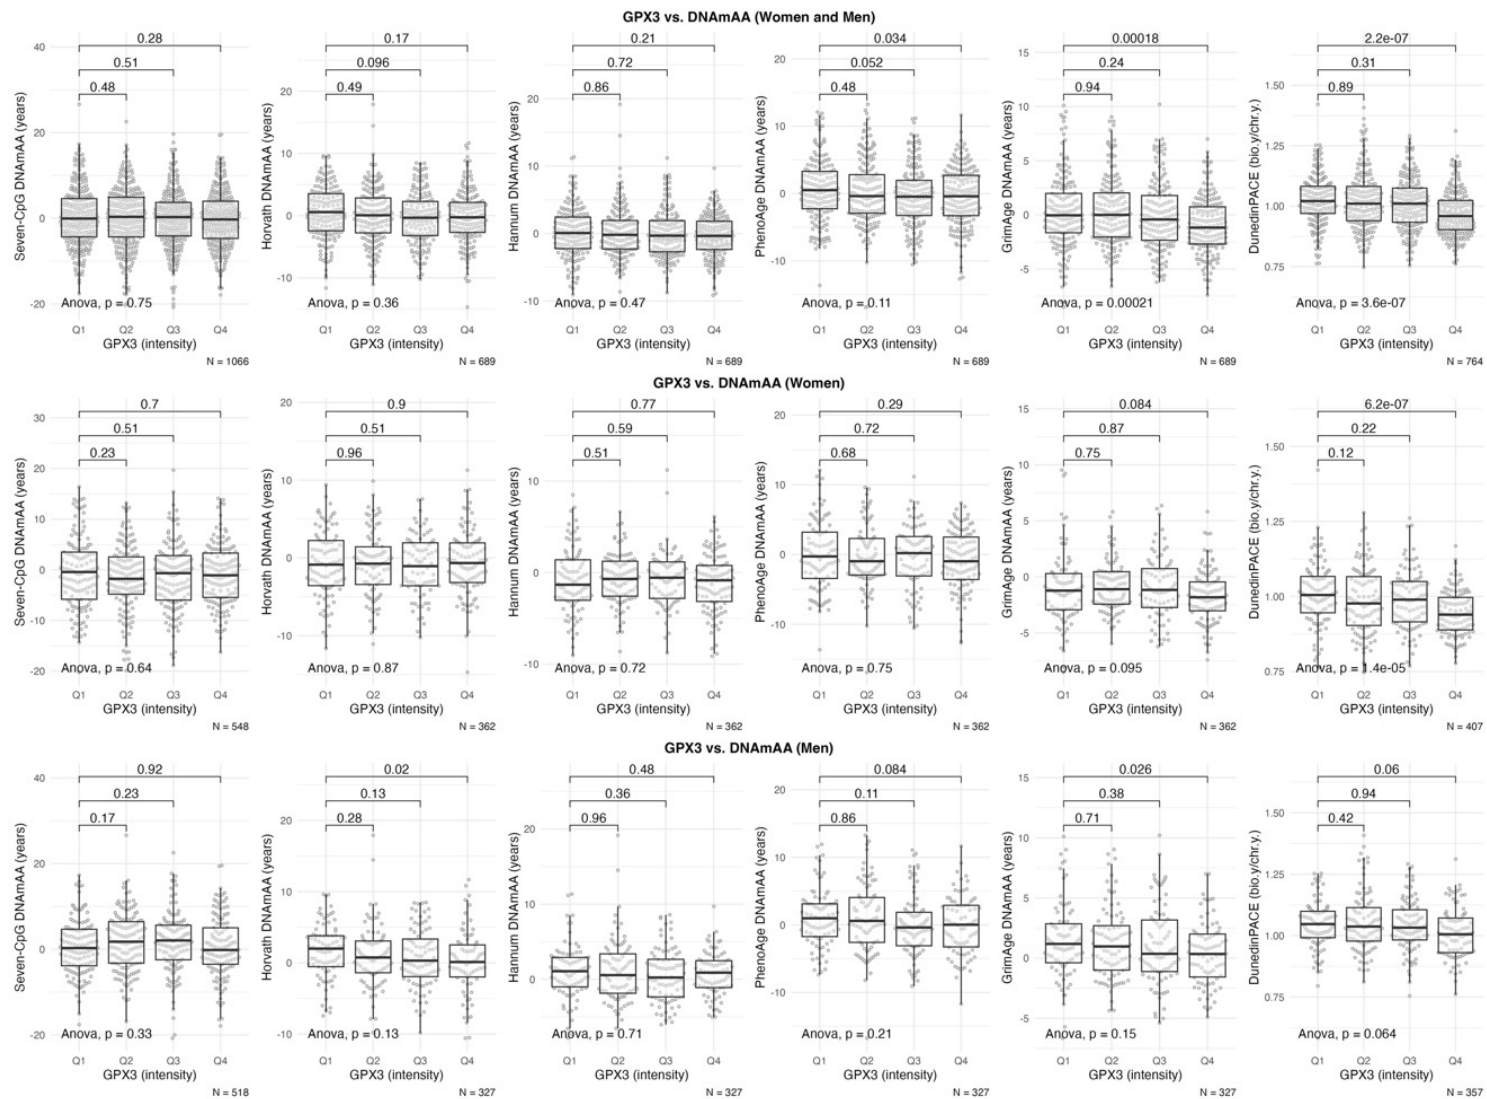

Supplementary Table 4: Boxplots of biological age estimators calculated by all six available epigenetic clocks stratified by quartiles of GPX3 intensities (proteomics) in men and women (A), women (B) and men (C). Statistical significance of difference between group means was assessed by t-test.
